# Supplementary material
Source: publisher figshare collection journal article supplement (https://acs.figshare.com/ndownloader/files/4219120)
Supplement: Supplementary file 1 [file 4219120]

***Supplementary Information:***

**Electrochemiluminescent  
Peptide Nucleic Acid-like monomers containing  
Ru(II)-dipyridoquinoxaline and  
Ru(II)-dipyridophenazine complexes**

*Tanmaya Joshi,<sup>a</sup> Gregory J. Barbante,<sup>b</sup> Paul S. Francis,<sup>b</sup> Conor F. Hogan,<sup>c</sup> Alan M. Bond<sup>a</sup>  
and Leone Spiccia<sup>a\*</sup>*

<sup>a)</sup> ARC Centre of Excellence for Electromaterials Science and School of Chemistry, Monash University, Clayton, Victoria 3800, Australia

<sup>b)</sup> School of Life and Environmental Sciences, Deakin University, Geelong, Victoria, 3217, Australia.

<sup>c)</sup> Department of Chemistry, La Trobe Institute for Molecular Science, La Trobe University, Victoria, 3086, Australia.

**RECEIVED DATE (to be automatically inserted after your manuscript is accepted if  
required according to the journal that you are submitting your paper to)**

\* Corresponding author. Email: [Leone.Spiccia@monash.edu](mailto:Leone.Spiccia@monash.edu) Fax : +61 3 9905 4597.

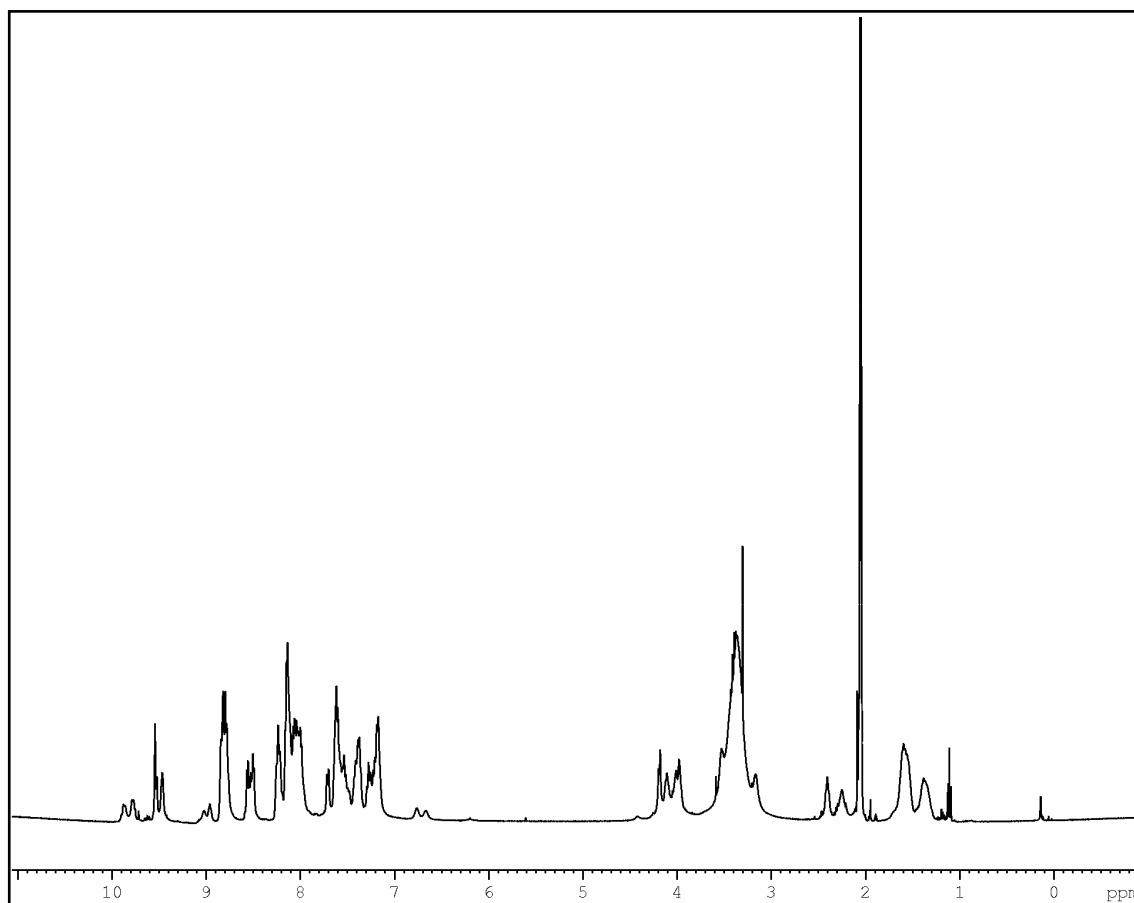

**Figure S1:**  $^1\text{H}$  NMR spectrum of  $[\text{Ru}(\text{bpy})_2(\text{dpq-L-PNA-OH})](\text{PF}_6)_2$  (M1) in  $\text{d}_6$ -acetone.

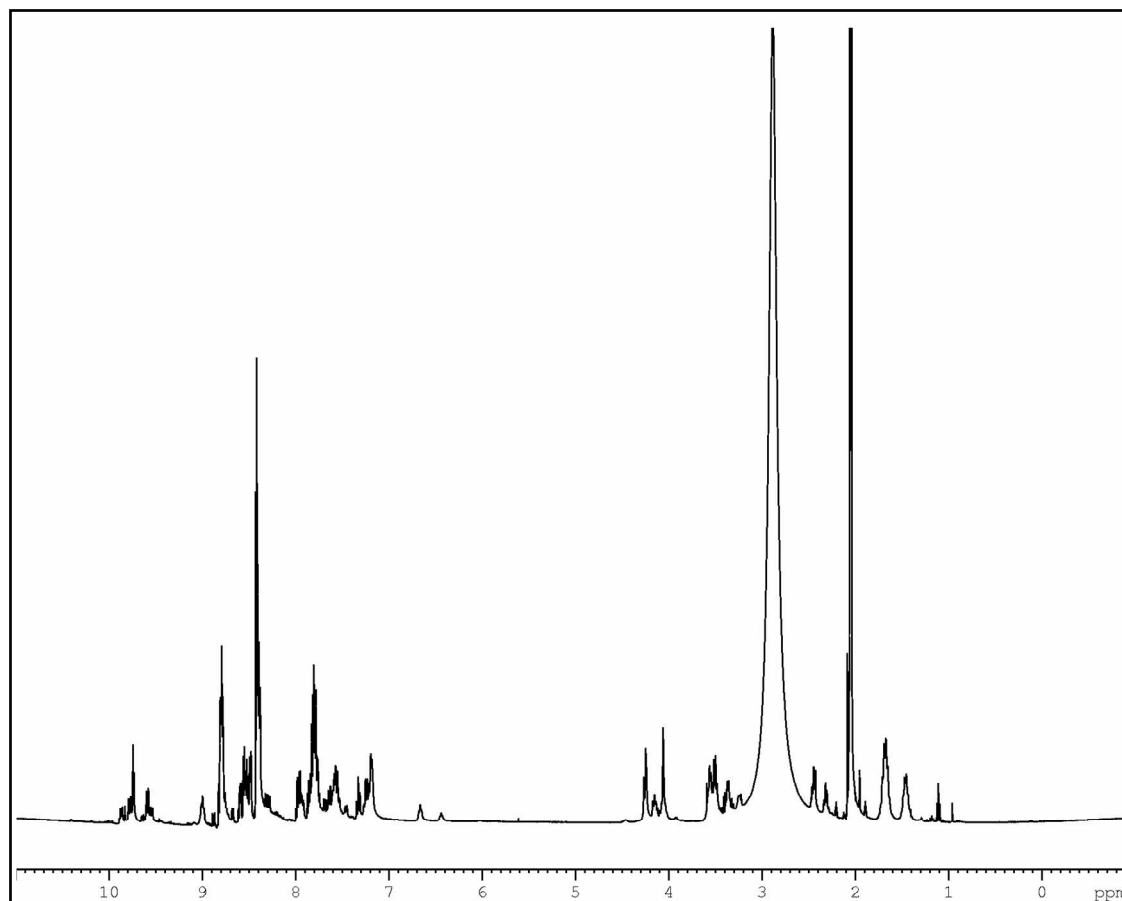

**Figure S2:**  $^1\text{H}$  NMR spectrum of  $[\text{Ru}(\text{phen})_2(\text{dpq-L-PNA-OH})](\text{PF}_6)_2$  (M2) in  $\text{d}_6$ -acetone.

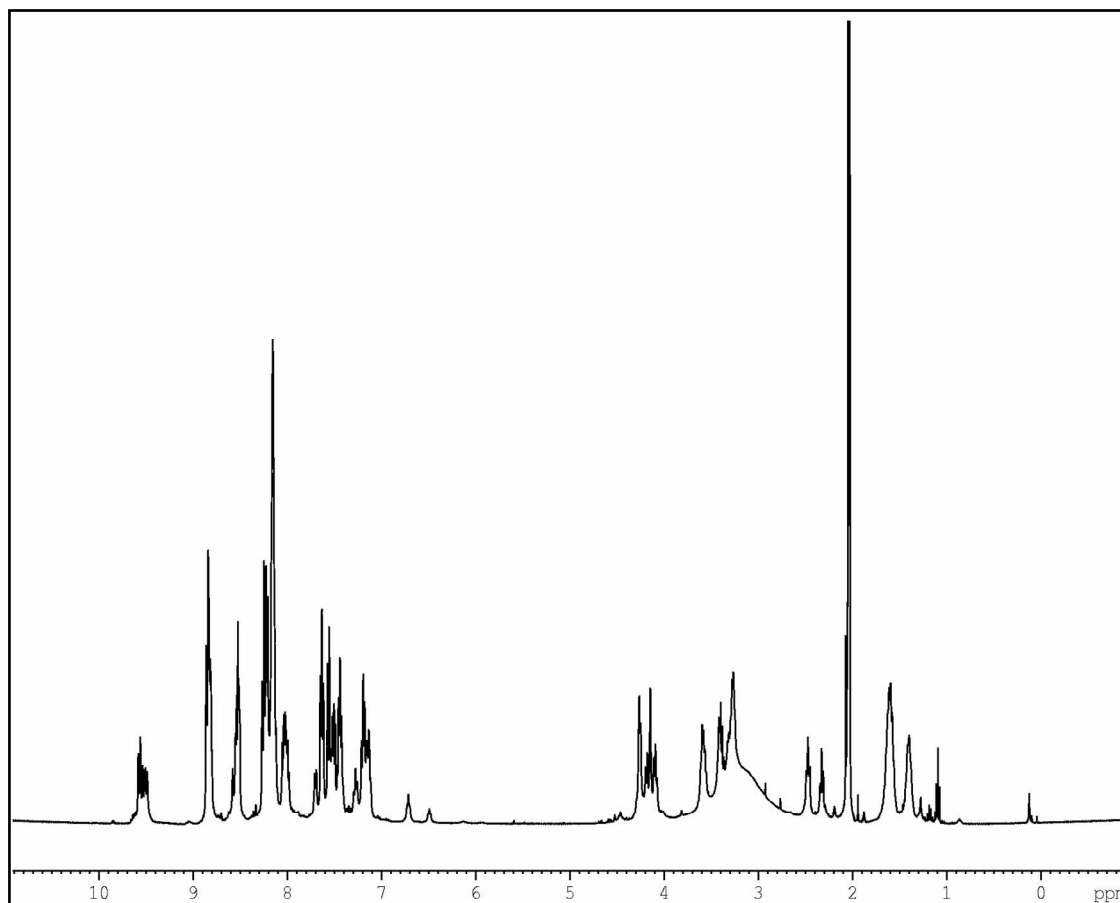

**Figure S3:**  $^1\text{H}$  NMR spectrum of  $[\text{Ru}(\text{bpy})_2(\text{dppz-L-PNA-OH})](\text{PF}_6)_2$  (M3) measured in  $\text{d}_6$ -acetone.

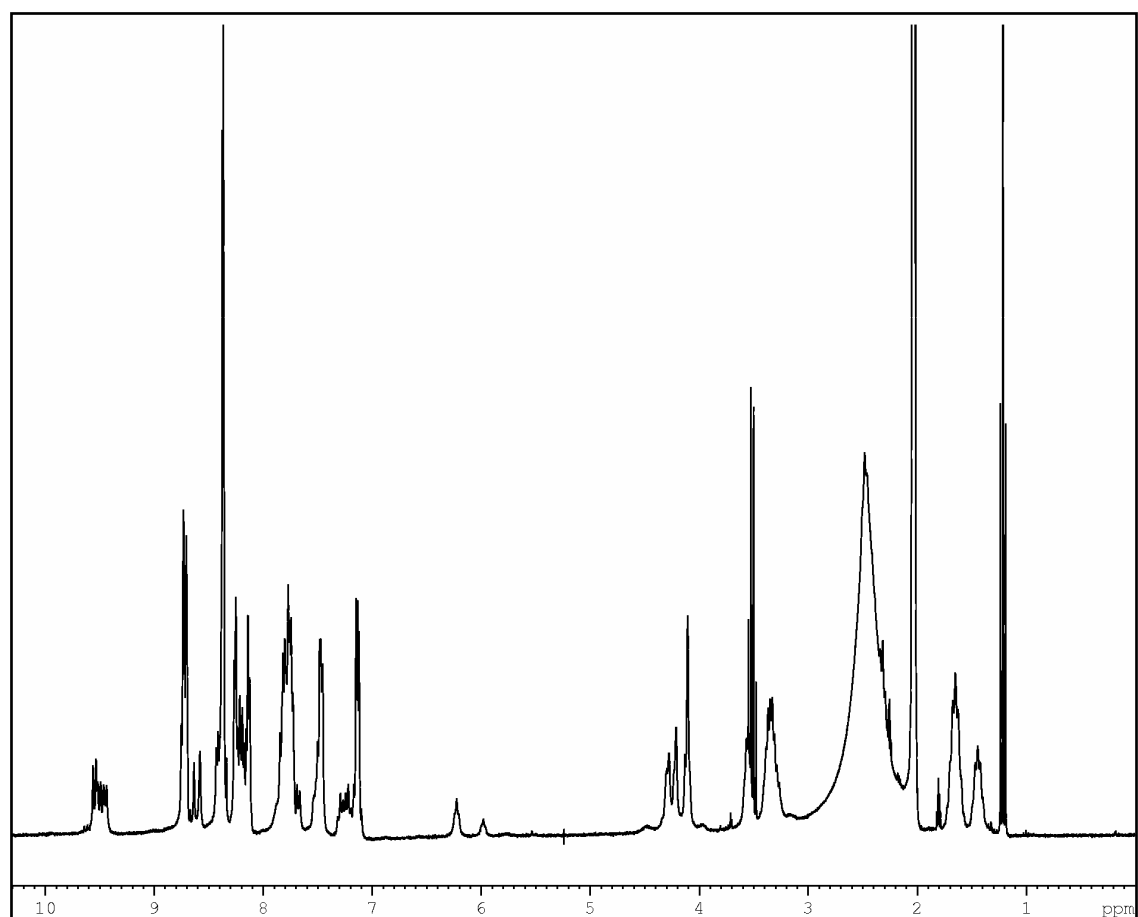

**Figure S4:**  $^1\text{H}$  NMR spectrum of  $[\text{Ru}(\text{phen})_2(\text{dppz-L-PNA-OH})](\text{PF}_6)_2$  (M4) in  $\text{CD}_3\text{CN}$ .

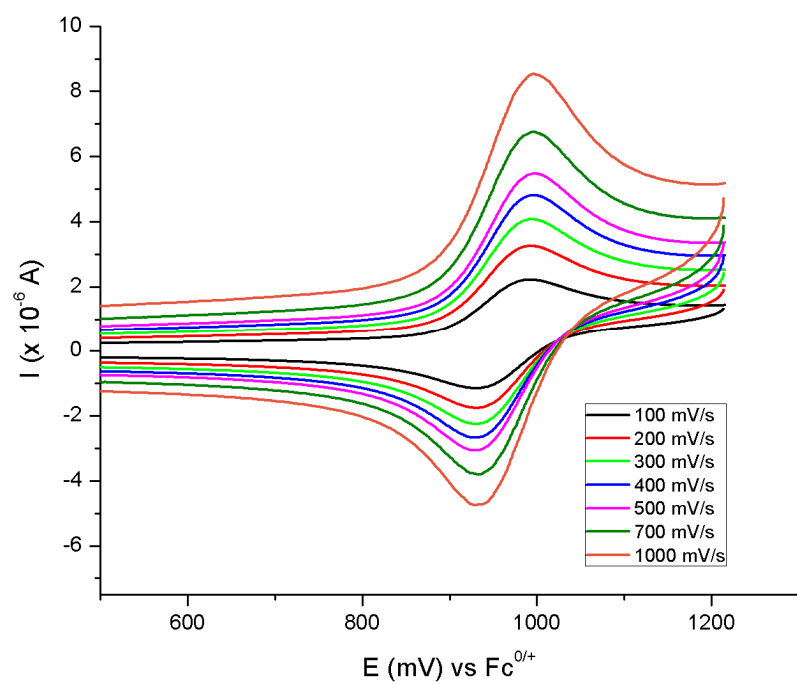

**Figure S5.** Cyclic voltammograms obtained at a glassy carbon electrode for oxidation of 1 mM **M1** in  $\text{CH}_3\text{CN}$  (0.1 M  $\text{nBu}_4\text{PF}_6$ ) as a function of scan rate.

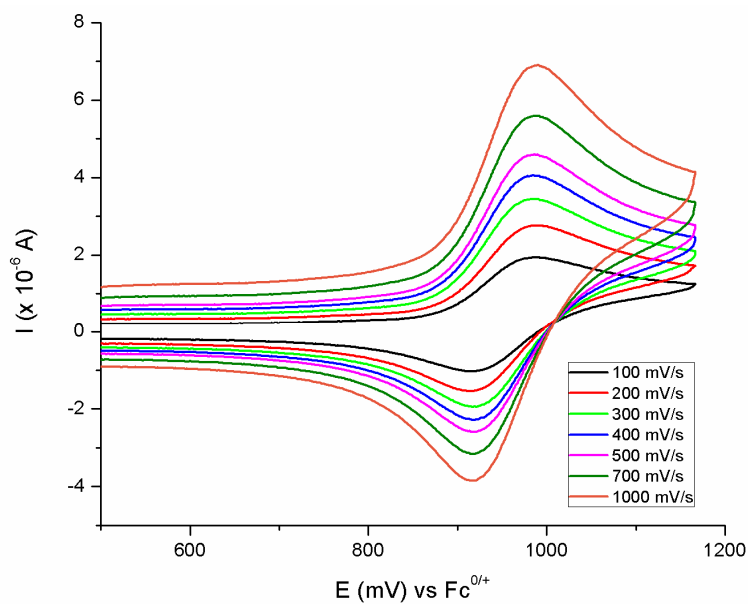

**Figure S6.** Cyclic voltammograms obtained at a glassy carbon electrode for oxidation of 1 mM **M2** in  $\text{CH}_3\text{CN}$  (0.1 M  $\text{nBu}_4\text{PF}_6$ ) as a function of scan rate.

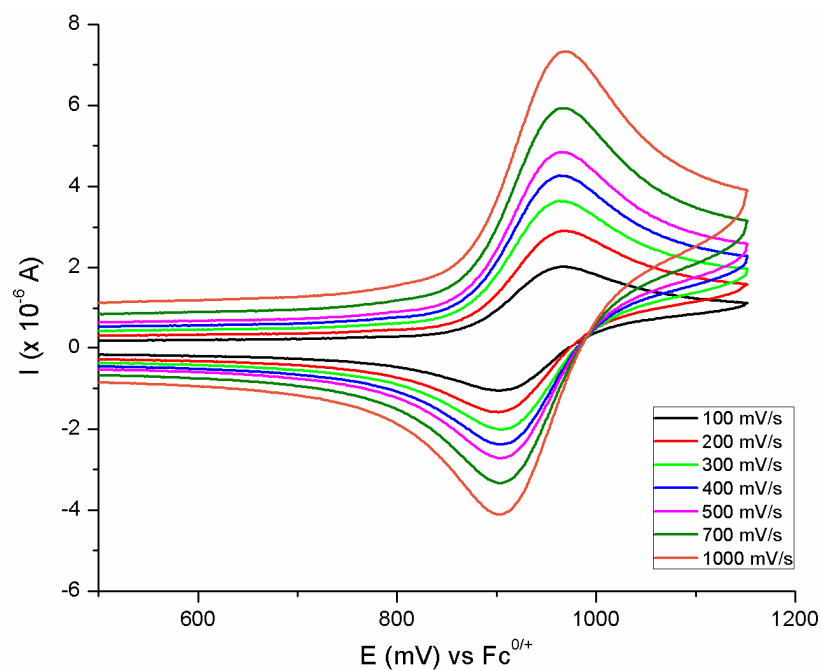

**Figure S7.** Cyclic voltammograms obtained at a glassy carbon electrode for oxidation of 1 mM **M3** in CH<sub>3</sub>CN (0.1 M nBu<sub>4</sub>PF<sub>6</sub>) as a function of scan rate.

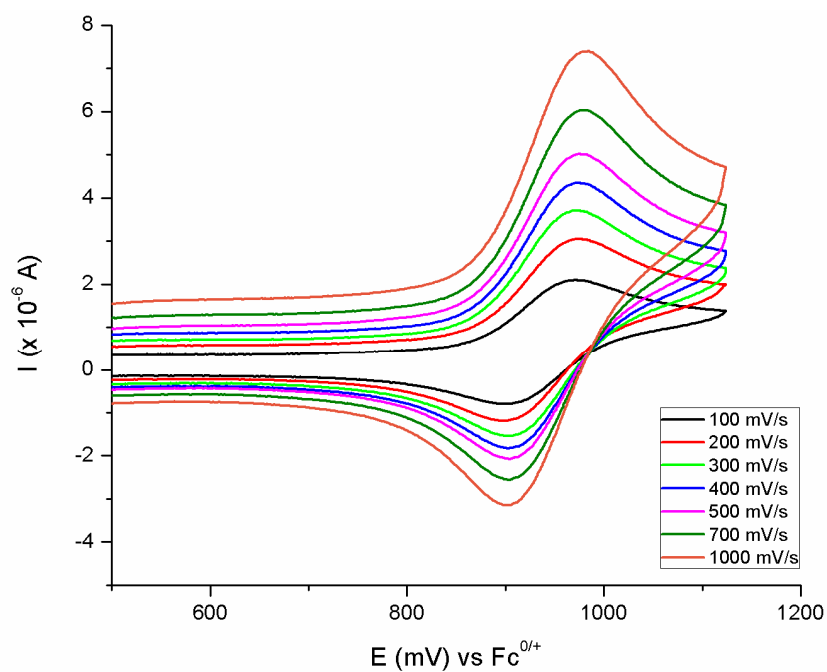

**Figure S8.** Cyclic voltammograms obtained at a glassy carbon electrode for oxidation of 1 mM **M4** in CH<sub>3</sub>CN (0.1 M nBu<sub>4</sub>PF<sub>6</sub>) as a function of scan rate.
